# Supplementary material for: Construction of competing endogenous RNA interaction network as prognostic markers in metastatic melanoma
Source: PeerJ journal article supplement (doi:10.7717/peerj.12143), 2021-09-15

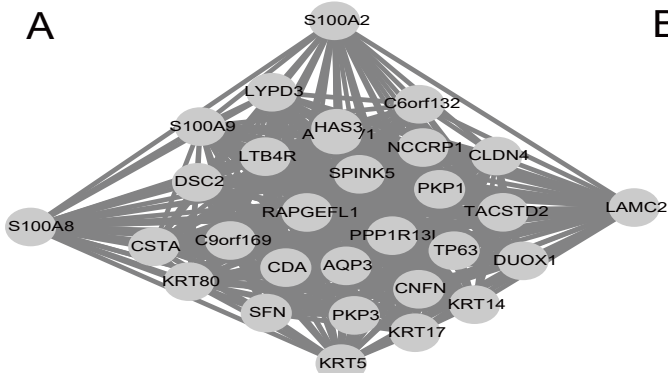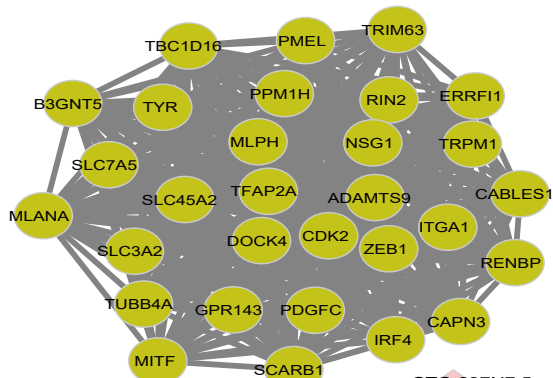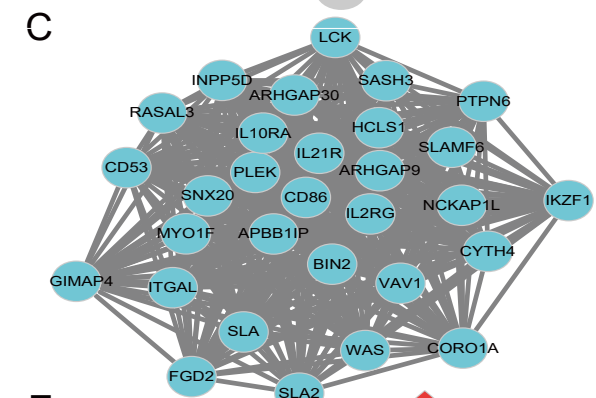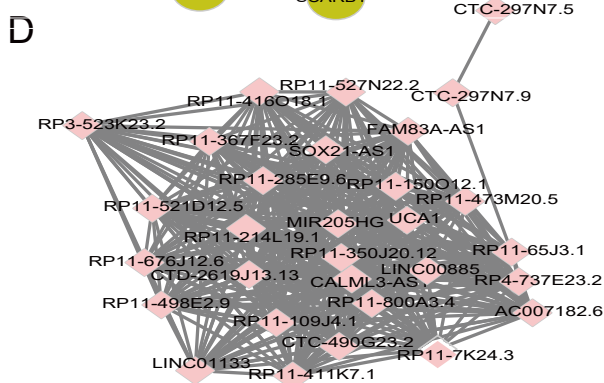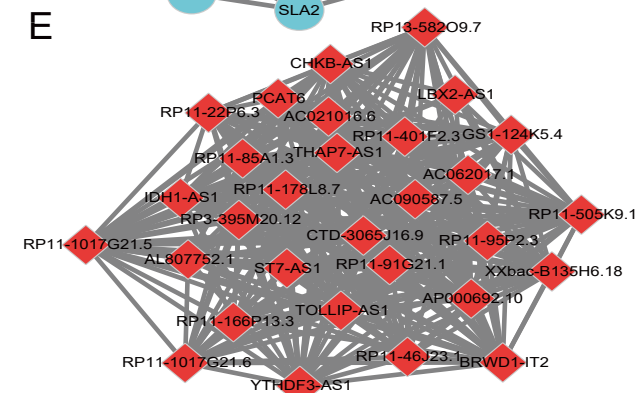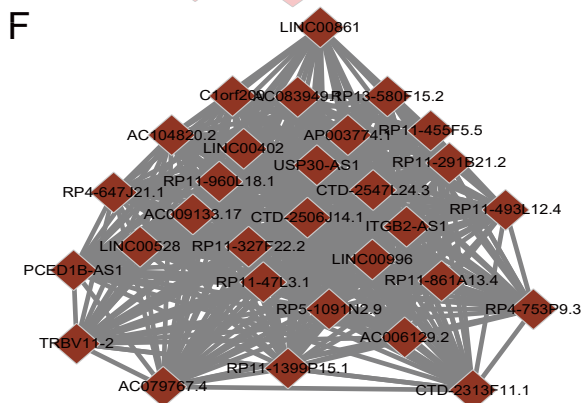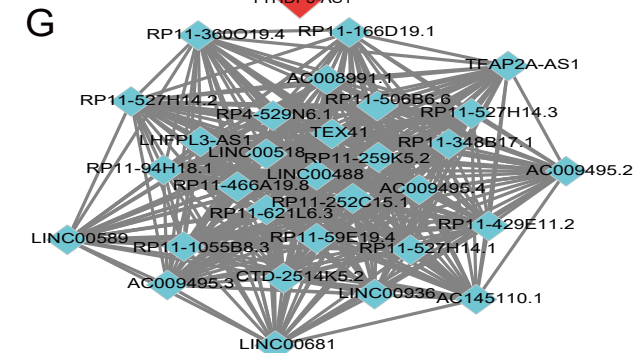

Supplement: FigureS2.pdf [file FigureS2.pdf]
